# Supplementary material for: Multi-Gene Mutation Profiling by Targeted Next-Generation Sequencing in Premenopausal Breast Cancer
Source: MDPI journal article supplement (doi:10.3390/genes13081362), 2022-07-29
Supplement: s1 [file s1]

Supplementary Table S1: Germline and somatic mutations of 54 premenopausal women with breast cancer as determined by NGS in relation to each patient's distinct clinicopathological characteristics.

| Patient ID Number | Germline Pathogenic mutations | Germline VUS mutations | Somatic pathogenic mutations           | Somatic VUS mutations            | Age (at Initial Diagnosis) | Stage | Breast Location | T | N | M | Histological Type | ER (at Initial Diagnosis) | PR (at Initial Diagnosis) | HER2 (at Initial Diagnosis) | KI67 (at Initial Diagnosis) | Grade | Molecular Subtype         |
|-------------------|-------------------------------|------------------------|----------------------------------------|----------------------------------|----------------------------|-------|-----------------|---|---|---|-------------------|---------------------------|---------------------------|-----------------------------|-----------------------------|-------|---------------------------|
| 2                 | (-)                           | (-)                    | (-)                                    | (-)                              | 28                         | IIIA  | LEFT            | 2 | 2 | 0 | IDC               | POSITIVE                  | POSITIVE                  | POSITIVE                    | ≥20%                        | 3     | LUMINAL B (HER2 POSITIVE) |
| 3                 | (-)                           | (-)                    | TP53 (c.424_433del, p. Pro142Cysfs*25) | (-)                              | 36                         | IA    | RIGHT           | 1 | 0 | 0 | IDC               | POSITIVE                  | POSITIVE                  | POSITIVE                    | <20%                        | 2     | LUMINAL B (HER2 POSITIVE) |
| 4                 | (-)                           | (-)                    | N/A                                    | N/A                              | 32                         | IIA   | LEFT            | 2 | 0 | 0 | IDC               | POSITIVE                  | POSITIVE                  | NEGATIVE                    | <20%                        | 3     | LUMINAL A                 |
| 5                 | (-)                           | (-)                    | PIK3CA (c.3140A>G, p. His1047Arg)      | BRCA1 (c.3743C>T, p.a1248v)      | 38                         | IIB   | RIGHT           | 2 | 1 | 0 | IDC               | POSITIVE                  | POSITIVE                  | NEGATIVE                    | ≥20%                        | 3     | LUMINAL B (HER2 NEGATIVE) |
|                   |                               |                        | PIK3CA (c.1090G>A, p. Gly364Arg)       | TP53 (c.622G>A, p.d208n)         |                            |       |                 |   |   |   |                   |                           |                           |                             |                             |       |                           |
| 6                 | (-)                           | (-)                    | (-)                                    | (-)                              | 40                         | IIIC  | LEFT            | 3 | 3 | 0 | ILC               | NEGATIVE                  | NEGATIVE                  | POSITIVE                    | <20%                        | 3     | HER2 ENRICHED             |
| 7                 | (-)                           | (-)                    | TP53 (c.743G>A, p. Arg248Gln)          | KMT2C (c.4873G>A, p. Glu1625Lys) | 37                         | IIIA  | LEFT            | 3 | 2 | 0 | IDC               | POSITIVE                  | POSITIVE                  | NEGATIVE                    | ≥20%                        | 3     | LUMINAL B (HER2 NEGATIVE) |
| 8                 | TP53 (c824g>a, p. Cys275Tyr)  | (-)                    | TP53 (c.824g>a, p. Cys255Tyr)          | ROS1 (c433A>C, p. Thr145Pro)     | 32                         | IIIA  | LEFT            | 4 | x | 0 | IDC               | NEGATIVE                  | NEGATIVE                  | POSITIVE                    | ≥20%                        | 3     | HER2 ENRICHED             |
|                   |                               |                        |                                        | RET (c.1684A>T, p. Thr562Ser)    |                            |       |                 |   |   |   |                   |                           |                           |                             |                             |       |                           |
| 9                 | (-)                           | (-)                    | TP53 (c.990del, p. Gln331Argfs*14)     | MET (c.4090C>T, p. Pro1364Ser)   | 40                         | IIIA  | RIGHT           | 3 | 1 | 0 | IDC               | NEGATIVE                  | POSITIVE                  | NEGATIVE                    | ≥20%                        | 3     | LUMINAL B (HER2 NEGATIVE) |
|                   |                               |                        |                                        | NF1 (c.563C>A, p. Ala188Glu)     |                            |       |                 |   |   |   |                   |                           |                           |                             |                             |       |                           |
| 10                | (-)                           | (-)                    | N/A                                    | N/A                              | 40                         | IIIC  | RIGHT           | x | x | 0 | IDC               | NEGATIVE                  | NEGATIVE                  | POSITIVE                    | ≥20%                        | 2     | HER2 ENRICHED             |
| 11                | (-)                           | (-)                    | N/A                                    | N/A                              | 37                         | IIB   | RIGHT           | 2 | 1 | 0 | IDC               | NEGATIVE                  | NEGATIVE                  | NEGATIVE                    | ≥20%                        | 3     | TNBC                      |

|    |                                                |     |                                      |                                                |    |          |                      |                       |                       |         |     |              |              |              |      |   |                                         |
|----|------------------------------------------------|-----|--------------------------------------|------------------------------------------------|----|----------|----------------------|-----------------------|-----------------------|---------|-----|--------------|--------------|--------------|------|---|-----------------------------------------|
| 12 | (-)                                            | (-) | PTEN<br>(c.99_100ins, p.<br>Ala34fs) | FGFR3<br>(c.2272G>A, p.<br>Asp758Asn)          | 40 | III<br>A | LEFT                 | 3                     | 1                     | 0       | IDC | POSITI<br>VE | POSITI<br>VE | NEGAT<br>IVE | <20% | 2 | LUMIN<br>AL A                           |
|    |                                                |     |                                      | ROS1<br>(c.1135C>G, p.<br>Gln379Glu)           |    |          |                      |                       |                       |         |     |              |              |              |      |   |                                         |
|    |                                                |     |                                      | BRAF<br>(c.1159G>A, p.<br>Gly387Arg)           |    |          |                      |                       |                       |         |     |              |              |              |      |   |                                         |
|    |                                                |     |                                      | TP53 (c.691del,<br>p.<br>Thr231ProfsTer<br>16) |    |          |                      |                       |                       |         |     |              |              |              |      |   |                                         |
| 13 | BRCA1<br>(c.5266dup,<br>p.<br>Gln1756Profs*74) | (-) | (-)                                  | (-)                                            | 40 | IIIC     | LEFT                 | 2                     | 3                     | 0       | IDC | NEGAT<br>IVE | NEGAT<br>IVE | NEGAT<br>IVE | ≥20% | 3 | TNBC                                    |
|    | MUTYH<br>(c.452A>G,<br>p.<br>Tyr151Cys)        |     |                                      |                                                |    |          |                      |                       |                       |         |     |              |              |              |      |   |                                         |
| 14 | CHECK2<br>(c.1232G>A,<br>p. Trp411*)           | (-) | N/A                                  | N/A                                            | 40 | III<br>A | RIGHT                | N/<br>A               | N/A                   | N/<br>A | IDC | POSITI<br>VE | POSITI<br>VE | NEGAT<br>IVE | ≥20% | 3 | LUMIN<br>AL B<br>(HER2<br>NEGATI<br>VE) |
| 15 | (-)                                            | (-) | ATM (c.494T>G,<br>p.Leu165*)         | ATM<br>(c.482A>C, p.<br>Gln161Pro)             | 47 | IA       | RIGHT                | 1                     | 0                     | 0       | IDC | NEGAT<br>IVE | NEGAT<br>IVE | NEGAT<br>IVE | ≥20% | 3 | TNBC                                    |
| 16 | (-)                                            | (-) | AKT1 (c.49G>A,<br>p.Glu17Lys)        | PTEN<br>(c.481A>G, p.<br>Arg161Gly)            | 52 | IIB      | RIGHT<br>AND<br>LEFT | R:T<br>2,<br>L:<br>T2 | R:N<br>0,<br>L:N<br>1 | 0       | ILC | POSITI<br>VE | POSITI<br>VE | NEGAT<br>IVE | <20% | 3 | LUMIN<br>AL A                           |
|    |                                                |     |                                      | RAD50<br>(c.443A>G, p.<br>Lys148Arg)           |    |          |                      |                       |                       |         |     |              |              |              |      |   |                                         |
| 17 | (-)                                            | (-) | N/A                                  | N/A                                            | 47 | IIA      | LEFT                 | 1                     | 1                     | 0       | IDC | POSITI<br>VE | POSITI<br>VE | NEGAT<br>IVE | <20% | 2 | LUMIN<br>AL A                           |
| 18 | (-)                                            | (-) | N/A                                  | N/A                                            | 44 | III<br>A | LEFT                 | 1                     | 2                     | 0       | IDC | POSITI<br>VE | POSITI<br>VE | NEGAT<br>IVE | ≥20% | 2 | LUMIN<br>AL B<br>(HER2<br>NEGATI<br>VE) |
| 19 | (-)                                            | (-) | N/A                                  | N/A                                            | 42 | IIB      | LEFT                 | 3                     | 0                     | 0       | IDC | POSITI<br>VE | POSITI<br>VE | NEGAT<br>IVE | <20% | 2 | LUMIN<br>AL A                           |
| 20 | (-)                                            | (-) | N/A                                  | N/A                                            | 45 | IA       | RIGHT                | 1                     | 0                     | 0       | IDC | NEGAT<br>IVE | NEGAT<br>IVE | NEGAT<br>IVE | ≥20% | 3 | TNBC                                    |
| 21 | (-)                                            | (-) | N/A                                  | N/A                                            | 44 | IA       | RIGHT                | 1                     | 0                     | 0       | IDC | POSITI<br>VE | POSITI<br>VE | POSITI<br>VE | ≥20% | 3 | LUMIN<br>AL B                           |

|    |     |                                             |                                   |                                              |    |       |       |   |   |   |     |           |           |           |      |   |                             |
|----|-----|---------------------------------------------|-----------------------------------|----------------------------------------------|----|-------|-------|---|---|---|-----|-----------|-----------|-----------|------|---|-----------------------------|
|    |     |                                             |                                   |                                              |    |       |       |   |   |   |     |           |           |           |      |   | (HER2 POSITIV E)            |
| 22 | (-) | (-)                                         | N/A                               | N/A                                          | 46 | IIA   | LEFT  | 2 | 0 | 0 | IDC | POSITI VE | POSITI VE | POSITI VE | ≥20% | 3 | LUMIN AL B (HER2 POSITIV E) |
| 23 | (-) | (-)                                         | N/A                               | N/A                                          | 48 | IIIB  | LEFT  | 4 | 2 | 0 | IDC | POSITI VE | POSITI VE | NEGAT IVE | ≥20% | 3 | LUMIN AL B (HER2 NEGATI VE) |
| 24 | (-) | (-)                                         | N/A                               | N/A                                          | 43 | IIB   | LEFT  | 2 | 1 | 0 | IDC | POSITI VE | POSITI VE | NEGAT IVE | <20% | 2 | LUMIN AL A                  |
| 25 | (-) | (-)                                         | TP53 (c.824G>A, p. Cys275Tyr)     | KMT2C (c.7826G>A, p. Arg2609Gln)             | 45 | IA    | LEFT  | 1 | 0 | 0 | IDC | NEGAT IVE | NEGAT IVE | POSITI VE | ≥20% | 3 | HER2 ENRICH ED              |
|    |     |                                             |                                   | RB1 (c.1988A>G, p. Asn663Ser)                |    |       |       |   |   |   |     |           |           |           |      |   |                             |
|    |     |                                             |                                   | NOTCH1 (c.2453T>C, p. Leu818Pro)             |    |       |       |   |   |   |     |           |           |           |      |   |                             |
| 26 | (-) | (-)                                         | N/A                               | N/A                                          | 46 | IA    | RIGHT | 1 | 0 | 0 | IDC | POSITI VE | POSITI VE | NEGAT IVE | <20% | 1 | LUMIN AL A                  |
| 27 | (-) | (-)                                         | PIK3CA (c.3140A>G, p. His1047Arg) | ROS1 (c.500G>A, p. Arg167Gln)                | 52 | IV    | LEFT  | x | x | 1 | IDC | POSITI VE | POSITI VE | NEGAT IVE | ≥20% | 3 | LUMIN AL B (HER2 NEGATI VE) |
|    |     |                                             | TP53 (c.743G>A, p. Arg248Gln)     |                                              |    |       |       |   |   |   |     |           |           |           |      |   |                             |
| 28 | (-) | ATM (c.7475T>G, p. Leu2492Arg)              | N/A                               | N/A                                          | 33 | III A | RIGHT | 3 | 1 | 0 | IDC | POSITI VE | POSITI VE | NEGAT IVE | <20% | 3 | LUMIN AL A                  |
| 29 | (-) | BRCA1 (c.3649T>C, p. Ser1217Pro)            | (-)                               | (-)                                          | 20 | IIIC  | LEFT  | 2 | 3 | 0 | IDC | POSITI VE | POSITI VE | NEGAT IVE | ≥20% | 3 | LUMIN AL B (HER2 NEGATI VE) |
| 30 | (-) | BRCA2 (c. 1342C>T, p. Arg448Cys)            | N/A                               | N/A                                          | 35 | IA    | LEFT  | 1 | 0 | 0 | IDC | POSITI VE | POSITI VE | NEGAT IVE | ≥20% | 2 | LUMIN AL B (HER2 NEGATI VE) |
| 31 | (-) | BRCA2 (c. 9613_9614delinsCT, p. Ala3205Leu) | (-)                               | BRCA2 (c. 9613_9614delins CT, p. Ala3205Leu) | 34 | IV    | RIGHT | x | x | 1 | IDC | POSITI VE | POSITI VE | NEGAT IVE | ≥20% | 2 | LUMIN AL B (HER2            |

|    |                                                                                          |                                         |                                             |                                                                               |    |          |       |   |   |   |     |              |              |              |      |   |                                         |
|----|------------------------------------------------------------------------------------------|-----------------------------------------|---------------------------------------------|-------------------------------------------------------------------------------|----|----------|-------|---|---|---|-----|--------------|--------------|--------------|------|---|-----------------------------------------|
|    |                                                                                          | RAD51D<br>(c.412A>C, p.<br>Asn138His)   |                                             |                                                                               |    |          |       |   |   |   |     |              |              |              |      |   | NEGATI<br>VE)                           |
| 32 | BRCA1<br>(c.3700_3704del, p.<br>Val1234Glnfs*8)<br>CHECK2<br>(c.470T>C, p.<br>Ile157Thr) | BRCA2<br>(c.352C>T, p.<br>Arg118Cys)    | N/A                                         | N/A                                                                           | 37 | IIB      | RIGHT | 2 | 1 | 0 | IDC | POSITI<br>VE | NEGAT<br>IVE | NEGAT<br>IVE | ≥20% | 3 | LUMIN<br>AL B<br>(HER2<br>NEGATI<br>VE) |
| 33 | (-)                                                                                      | BRCA2<br>(c.9867T>G, p.<br>Phe3289Leu)  | TP53<br>(c.85_86del, p.<br>Asn29GlnfsTer13) | BRCA2<br>(c.9867T>G, p.<br>Phe3289Leu)<br>ROS1<br>(c.433A>C, p.<br>Thr145Pro) | 46 | IIIC     | LEFT  | 1 | 3 | 0 | IDC | POSITI<br>VE | POSITI<br>VE | POSITI<br>VE | ≥20% | 3 | LUMIN<br>AL B<br>(HER2<br>POSITIV<br>E) |
| 34 | (-)                                                                                      | BRCA2<br>(c.8386C>T, p.<br>Pro2796Ser)  | N/A                                         | N/A                                                                           | 38 | IA       | RIGHT | 1 | 0 | 0 | IDC | POSITI<br>VE | POSITI<br>VE | NEGAT<br>IVE | ≥20% | 3 | LUMIN<br>AL B<br>(HER2<br>NEGATI<br>VE) |
| 35 | (-)                                                                                      | BRIP1 (c.<br>2285G>A, p.<br>Arg762His)  | N/A                                         | N/A                                                                           | 33 | III<br>A | RIGHT | 3 | 2 | 0 | IDC | POSITI<br>VE | POSITI<br>VE | NEGAT<br>IVE | ≥20% | 3 | LUMIN<br>AL B<br>(HER2<br>NEGATI<br>VE) |
| 36 | (-)                                                                                      | CHECK2<br>(c.480A>G, p.<br>Ile160Met)   | (-)                                         | (-)                                                                           | 29 | IIIC     | LEFT  | 4 | 3 | 0 | IDC | POSITI<br>VE | NEGAT<br>IVE | NEGAT<br>IVE | ≥20% | 2 | LUMIN<br>AL B<br>(HER2<br>NEGATI<br>VE) |
| 37 | (-)                                                                                      | CHECK2<br>(c.190G>A, p.<br>Glu64Lys)    | (-)                                         | FGFR1<br>(c.2192_*del, p.<br>Lys731_Arg732fs*159)                             | 43 | IIA      | RIGHT | 2 | 0 | 0 | IDC | POSITI<br>VE | NEGAT<br>IVE | POSITI<br>VE | ≥20% | 3 | LUMIN<br>AL B<br>(HER2<br>POSITIV<br>E) |
| 38 | (-)                                                                                      | CHECK2 (c.<br>1175C>T, p.<br>Ala392Val) | N/A                                         | N/A                                                                           | 37 | IV       | RIGHT | 2 | 1 | 1 | IDC | POSITI<br>VE | POSITI<br>VE | NEGAT<br>IVE | ≥20% | 3 | LUMIN<br>AL B<br>(HER2<br>NEGATI<br>VE) |
| 39 | (-)                                                                                      | CHECK2<br>(c.470T>C, p.<br>Ile157Thr)   | (-)                                         | (-)                                                                           | 40 | IIA      | LEFT  | 2 | 0 | 0 | IDC | POSITI<br>VE | POSITI<br>VE | POSITI<br>VE | ≥20% | 2 | LUMIN<br>AL B<br>(HER2<br>POSITIV<br>E) |

[illegible]

|    |     |                                |                                                                                                                    |                                                                                                  |    |      |            |                    |             |   |     |          |          |          |      |   |                           |
|----|-----|--------------------------------|--------------------------------------------------------------------------------------------------------------------|--------------------------------------------------------------------------------------------------|----|------|------------|--------------------|-------------|---|-----|----------|----------|----------|------|---|---------------------------|
| 49 | N/A | N/A                            | PIK3CA (exon2: c.115G>A, p.Glu39Lys)<br>TP53 (c.818G>T, p.Arg273Leu)                                               | (-)                                                                                              | 49 | IA   | Left       | 1                  | 0           | 0 | IDC | POSITIVE | POSITIVE | POSITIVE | <20% | 3 | LUMINAL B (HER2 POSITIVE) |
| 50 | N/A | N/A                            | PIK3CA (c.1624G>A, p. Glu542Lys)                                                                                   | RAD50 (c.2604T>G, p. Asn868Lys)                                                                  | 50 | IA   | RIGHT      | 1                  | 0           | 0 | IDC | POSITIVE | POSITIVE | NEGATIVE | <20% | 1 | LUMINAL A                 |
| 51 | N/A | N/A                            | PIK3CA (exon21: c.3140A>G, p. His1047Arg)<br>ERBB2 (exon19: c.2264T>C, p. Leu755Ser)                               | RAD50 (c.980G>A, p. Arg327His)<br>TP53 (c.304A>T, p. Thr102Ser)<br>NF1 (c.2573C>G, p. Ser858Cys) | 47 | IA   | LEFT+RIGHT | L:1<br>a R:1<br>lc | L:0,<br>R:0 | 0 | IDC | POSITIVE | POSITIVE | NEGATIVE | ≥20% | 2 | LUMINAL B (HER2 NEGATIVE) |
| 52 | N/A | N/A                            | BRCA2 (c.5576_5579del, p. Ile1859LysfsTer3 TTAA)                                                                   | (-)                                                                                              | 50 | IIIA | LEFT       | 1                  | 2           | 0 | IDC | POSITIVE | POSITIVE | NEGATIVE | <20% | 2 | LUMINAL A                 |
| 53 | (-) | PMS2 (c.1999G>A, p. Glu667Lys) | (-)                                                                                                                | (-)                                                                                              | 44 | IIIA | LEFT       | 1                  | 2           | 0 | IDC | POSITIVE | POSITIVE | NEGATIVE | ≥20% | 3 | LUMINAL B (HER2 NEGATIVE) |
| 54 | (-) | RAD51C (c.80T>C, p. Leu27Pro)  | N/A                                                                                                                | N/A                                                                                              | 48 | IA   | LEFT       | 1                  | 0           | 0 | IDC | NEGATIVE | NEGATIVE | NEGATIVE | ≥20% | 3 | TNBC                      |
| 55 | N/A | N/A                            | PIK3CA (c.1633G>A, p. Glu545Lys),<br>PTEN (c.923delG, p. Arg308LeufsTer9)<br>PTEN (c.923delA, p. Asp310IleufsTer7) | (-)                                                                                              | 39 | IV   | LEFT+RIGHT | L:1,<br>R:3        | L:2,<br>R:3 | 1 | IDC | POSITIVE | POSITIVE | NEGATIVE | ≥20% | 2 | LUMINAL B (HER2 NEGATIVE) |
